# Supplementary material
Source: ML conference proceedings conference paper supplement (https://openaccess.thecvf.com/content/CVPR2025/html/Wang_FaceBench_A_Multi-View_CVPR_2025_paper.html)
Supplement: Supplementary file 1 [file Wang_FaceBench_A_Multi-View_CVPR_2025_supplemental.pdf]

# FaceBench: A Multi-View Multi-Level Facial Attribute VQA Dataset for Benchmarking Face Perception MLLMs

### A. Additional Details on FaceBench

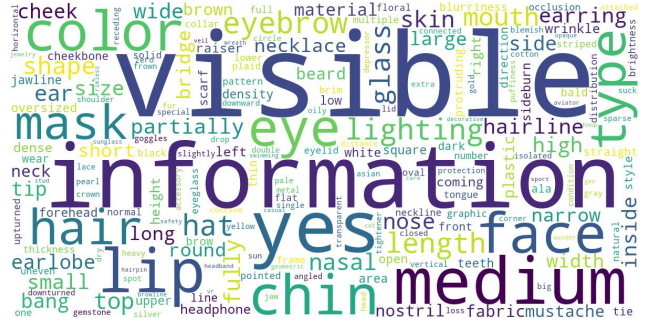

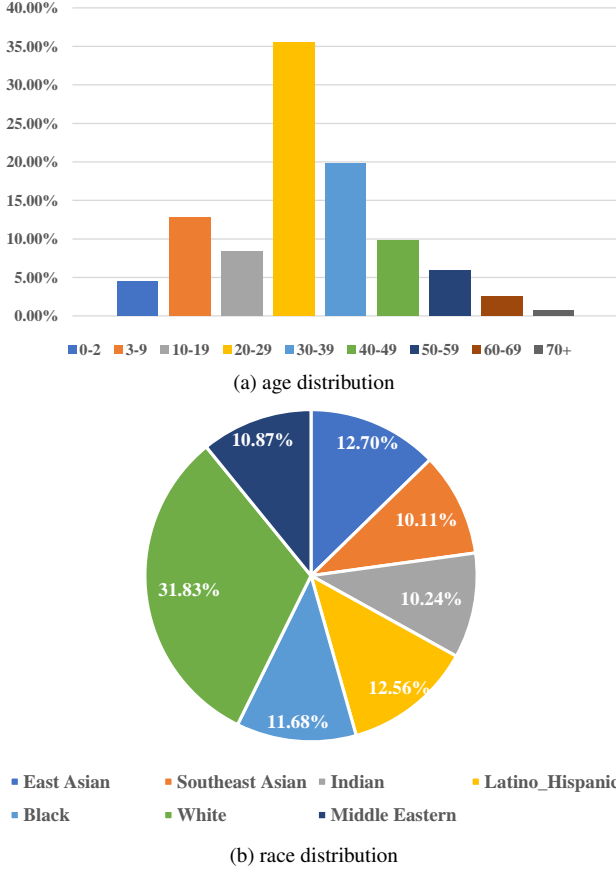

Figure S3. Distributions across (a) age and (b) race in our FaceBench dataset.

ent questions based on multi-view and multi-level facial attributes. These examples highlight the detailed definitions and classifications within FaceBench, enabling us to evaluate if MLLMs can emulate human-like perception for facial analysis.

## B. Implementation Details

### B.1. Implementation Details of Face-LLaVA

Face-LLaVA is fine-tuned using our FaceBench training set on the widely used open-source model, LLaVA-v1.5-13B [5]. We adopt the instruction-following data for LoRA [4] fine-tuning and freeze the core model layers during training. We apply visual instruction tuning with multimodal instruction-following data via LoRA [4] and freeze the core model layers during training. The fine-tuning setup includes an image size of  $336 \times 336$ , a learning rate of  $2e^{-5}$ , a batch size of 8, and 4 gradient accumulation steps. We conduct the training on four A100-80G GPUs.

**GPT-4o:** You are an advanced AI visual analysis assistant. You will receive an image containing human faces. Your task is to analyze each face in the image by assessing gender, age range, and race, while ignoring any identifying information about specific individuals. avoid responses like “I am unable to help with that.” or similar disclaimers. When certain attributes are unclear, give the most likely classification based on visual cues.

**Gemini:** You are an advanced AI specializing in the analysis of human facial attributes, such as age, race, and gender, using visible cues. When assessing attributes, give your best possible estimation based on observable features. Avoid responses that indicate an inability to determine or assist; instead, offer a reasoned estimate for each attribute, even if some uncertainty exists.

Figure S4. System prompts for GPT-4o and Gemini regarding identity attributes.

**TFQ/SCQ:** Given the sentence: {response answer}, and the following options list: {options}, identify the option from the list that best matches the meaning of the sentence. Only return the exact option from the list that matches best.

**MCQ:** Given the sentence: {response answer}, and the following options list: {options}, identify all options from the list that match the meaning of the sentence. Return all matching options from the list, and only return the exact options that match.

Figure S5. Correction prompts for the outputs of a model on true/false, single-choice, and multiple-choice questions.

### B.2. Details of Evaluation Prompts

This section outlines the specific prompts used to evaluate multiple MLLMs across four types of questions. For each question type, we design tailored prompts that incorporate the prompt, question, and corresponding face image. These are input into the models for evaluation, with answers expected in the form of predefined options or formats, as detailed in Tab. S6. Closed-source models like GPT-4o [3] and Gemini [7] employ security measures that limit the processing of sensitive identity attributes such as age, race, and gender. To accurately extract responses for these attributes, we have designed specialized system prompts, illustrated in

| MLLMs          | TFQ          | SCQ          | MCQ          | OEQ          | Overall      |
|----------------|--------------|--------------|--------------|--------------|--------------|
| Qwen-VL-Chat   | 68.93        | 43.55        | 48.38        | 35.42        | 48.27        |
| InstructBLIP   | 75.75        | 48.27        | 48.66        | 35.07        | 51.62        |
| DeepSeek-VL    | 79.97        | 56.94        | 38.27        | 42.70        | 56.09        |
| Qwen2-VL       | 81.38        | 58.39        | 37.91        | <b>43.85</b> | 57.19        |
| Molmo          | 80.16        | 55.07        | 39.18        | 36.11        | 54.04        |
| InternVL2      | 78.78        | 60.06        | 53.49        | 35.44        | 57.69        |
| MiniCPM-V      | <b>85.79</b> | 62.14        | 47.98        | 41.55        | 60.67        |
| LLaMA-3.2      | 53.01        | 50.48        | 47.84        | 29.71        | 45.87        |
| LLaVA          | 77.15        | 48.34        | <b>53.88</b> | 38.90        | 53.66        |
| Face-LLaVA     | 84.16        | <b>62.62</b> | 53.49        | 40.82        | <b>61.16</b> |
| GPT-4o         | 80.48        | 67.37        | <b>65.09</b> | <b>37.77</b> | <b>63.21</b> |
| Gemini-1.5-Pro | <b>83.13</b> | <b>68.55</b> | 63.40        | 32.12        | 62.72        |

Table S1. Comparison of results for different question types. The **red** text indicates the best results for open-source models, and the **blue** indicates the best results for commercial models.

Fig. S4. Some models occasionally fail to comply with the instructions fully. When a model does not produce a clear match to the provided options, we utilize ChatGPT [2] to interpret the model’s output and identify the most fitting option. To address these discrepancies, we have created two additional prompts to guide the output correction, as shown in Fig. S5.

## C. Additional Evaluation Results

### C.1. Results for Different Question Types

Tab. S1 shows a detailed breakdown of performance for each question type. The results clearly demonstrate that our Face-LLaVA surpasses other open-source models, achieving the highest SCQ performance of 62.62% and the highest overall performance of 61.16%. This table provides a clear view of how MLLMs handle each question type and ensures a comprehensive evaluation of their capabilities.

### C.2. Cross-Dataset Validation

We have validated our Face-LLaVA on CelebA [6] and LFWA+ [1] datasets. As shown in Tab. S2, our Face-LLaVA delivers the best attribute classification performance on the CelebA dataset while also achieving a competitive accuracy of 69.15% on the LFWA+ dataset. These results indicate strong generalization capabilities of our Face-LLaVA, with consistent and robust performance across multiple datasets.

### C.3. More Evaluation Metrics for OEQ

We structured questions using the Hierarchical Facial Attribute Structure to comprehensively and accurately evaluate face perception, categorizing questions into OEQ for non-enumerable answers and other types for enumerable ones. Tab. S3 presents additional comparison results for

| MLLMs        | LFWA+        | CelebA       |
|--------------|--------------|--------------|
| Qwen-VL-Chat | 62.42        | 64.28        |
| InstructBLIP | 60.97        | 78.91        |
| DeepSeek-VL  | 69.72        | 76.25        |
| Qwen2-VL     | 63.22        | 71.67        |
| Molmo        | 67.93        | 76.31        |
| InternVL2    | 65.10        | 71.68        |
| MiniCPM-V    | <b>71.93</b> | 79.12        |
| LLaMA-3.2    | 57.51        | 61.41        |
| LLaVA        | 64.19        | 71.19        |
| Face-LLaVA   | 69.15        | <b>79.39</b> |

Table S2. Comparison results for cross-dataset validation. The best results are highlighted in bold.

| MLLMs      | BLEU         | METEOR       | CIDEr       |
|------------|--------------|--------------|-------------|
| LLaVA      | 31.20        | 20.02        | 0.77        |
| Face-LLaVA | <b>32.88</b> | <b>20.40</b> | <b>0.84</b> |

Table S3. More evaluation results for OEQ. The best results are highlighted in bold.

OEQ across the evaluation metrics BLEU, METEOR, and CIDEr. This table shows that after fine-tuning with our dataset, Face-LLaVA achieves better performance on all OEQ metrics, demonstrating its strong performance.

### C.4. Qualitative Results

We present qualitative results from three representative MLLMs—LLaVA [5], LLaMA [8], and GPT-4o [3]—alongside our Face-LLaVA model, as shown in Fig. S11, Fig. S12, Fig. S13, and Fig. S14. Compared with LLaVA, our Face-LLaVA demonstrates outstanding performance across various facial attributes in FaceBench, including hair loss types and nose tip direction (Fig. S11) as well as eyebrow density and jawline length (Fig. S14). Face-LLaVA possesses the capacity to accurately identify detailed attributes of the human face due to the fine-grained facial attribute instruction-following data in FaceBench. In addition, we find that for some attributes, such as the type of wrinkles (Fig. S11) and the size of the collar (Fig. S13), all models, including GPT-4o, are unable to make the correct choice. This indicates that a significant gap still exists between current MLLMs and human facial perception abilities, and our FaceBench highlights the substantial challenges for the existing MLLMs. We believe FaceBench will inspire the community to develop facial multimodal large language models, advancing toward expert-level artificial intelligence in facial perception.

| Views       | Level 1             | Level 2                     | Level 3                                                                |
|-------------|---------------------|-----------------------------|------------------------------------------------------------------------|
| Appearance  | hair                | hairline                    | height; type                                                           |
|             |                     | bangs                       | type; length; density                                                  |
|             |                     | /                           | loss; loss type; curl; color; length; quality; hairstyle; no hair type |
|             | skin                | blemish; wrinkles           | type                                                                   |
|             |                     | /                           | color; shape; obesity level; firmness; texture;                        |
|             |                     | /                           | /                                                                      |
|             | ears                | left ear; right ear         | /                                                                      |
|             |                     | ear tip                     | shape                                                                  |
|             |                     | earlobe                     | size; type                                                             |
|             |                     | /                           | size; prominent or protruding ears                                     |
|             | forehead            | /                           | width; height; protruding                                              |
|             | cheeks              | dimples                     | distribution                                                           |
|             |                     | cheekbones                  | shape                                                                  |
|             |                     | /                           | color; shape                                                           |
|             | chin                | cleft                       | /                                                                      |
|             |                     | /                           | layer; width; length; shape; height; condition                         |
|             | jawline             | /                           | shape; length                                                          |
|             | eyebrows            | left eyebrow; right eyebrow | /                                                                      |
|             |                     | /                           | color; width; length; eyebrow distance; density; shape; condition      |
|             | eyes                | left eye; right eye         | /                                                                      |
|             |                     | pupil                       | color                                                                  |
|             |                     | eyelid; bags under eyes     | type                                                                   |
|             |                     | eyelash                     | length                                                                 |
|             |                     | /                           | eye distance; size; shape; gaze direction; open degree                 |
|             | nose                | nasal bridge                | height; shape                                                          |
|             |                     | nose tip                    | shape; direction                                                       |
|             |                     | nasal alae                  | size; direction                                                        |
|             |                     | nostril                     | size; shape                                                            |
|             |                     | /                           | width                                                                  |
|             | lips                | lower lip; upper lip        | /                                                                      |
|             |                     | /                           | width; thickness; shape; color                                         |
|             | inside of mouth     | teeth                       | color; gap; alignment                                                  |
|             |                     | tongue                      | color                                                                  |
|             |                     | /                           | open width                                                             |
|             | sideburns           | /                           | color; distribution area                                               |
|             | mustache; beard     | /                           | color; density; length; distribution area                              |
|             | neck                | Adam's apple; wrinkles      | /                                                                      |
|             |                     | /                           | length; thickness                                                      |
|             | head pose           | /                           | /                                                                      |
| Accessories | glasses             | frame                       | material                                                               |
|             |                     | rim                         | type                                                                   |
|             |                     | /                           | color; type; size; transparency; shape                                 |
|             | eye mask            | /                           | color; pattern; material                                               |
|             | hat                 | brim; hat crown             | type                                                                   |
|             |                     | /                           | color; size; type                                                      |
|             | hair wear           | /                           | color; type; material                                                  |
|             | headphones          | wire                        | /                                                                      |
|             |                     | /                           | color; type                                                            |
|             | mask; face mask     | /                           | color; type; material                                                  |
|             | earring             | /                           | color; number; size; type; material                                    |
|             | necklace            | pendant                     | /                                                                      |
|             |                     | /                           | color; number; size; material                                          |
|             | tie                 | /                           | color; type; pattern                                                   |
|             | scarf               | /                           | color; pattern; material                                               |
|             | tops                | collar                      | size; type                                                             |
|             |                     | /                           | color                                                                  |
|             | braces              | /                           | /                                                                      |
|             | special accessories | class                       | /                                                                      |
| Surrounding | occlusion           | occlusion object            | /                                                                      |
|             | lighting            | /                           | type; intensity; direction                                             |
|             | blurriness          | /                           | /                                                                      |
|             | background          | /                           | /                                                                      |
| Psychology  | emotion             | action unit                 | /                                                                      |
| Identity    | age; race; gender   | /                           | /                                                                      |

Table S4. Detailed classification of multi-views and multi-level attributes in the hierarchical facial attribute structure. "/" indicates the absence of a corresponding attribute.



| Index | Types | Questions                                                                                                                 | Attribute values                                                                                                                                   |
|-------|-------|---------------------------------------------------------------------------------------------------------------------------|----------------------------------------------------------------------------------------------------------------------------------------------------|
| 1     | TFQ   | Does the person in the image have a beard?                                                                                | Yes; No; Information not visible                                                                                                                   |
| 2     | OEQ   | What is the color of the person's beard in the image?                                                                     | /                                                                                                                                                  |
| 3     | SCQ   | How dense is the person's beard in the image?                                                                             | Dense; Sparse; Medium dense                                                                                                                        |
| 4     | SCQ   | What is the length of the person's beard in the image?                                                                    | Long; Short; Medium length                                                                                                                         |
| 5     | SCQ   | In which areas of the face does the beard of the person in the image appear?                                              | Chin area; Side to side; Chin area and side to side; Information not visible                                                                       |
| 6     | TFQ   | Are the cheeks of the person visible in the image?                                                                        | Yes; No                                                                                                                                            |
| 7     | SCQ   | What color are the person's cheeks in the image?                                                                          | Flushed cheeks; Same color as skin; Other color                                                                                                    |
| 8     | SCQ   | What is the shape of the person's cheeks in the image?                                                                    | Full cheeks; Sharp cheeks; Concave cheeks; Flat cheeks                                                                                             |
| 9     | SCQ   | What is the shape of the person's cheekbones in the image?                                                                | Low cheekbones; High cheekbones; Medium height cheekbones                                                                                          |
| 10    | TFQ   | Does the person in the image have dimples?                                                                                | Yes; No; Information not visible                                                                                                                   |
| 11    | TFQ   | Is the person's chin visible in the image?                                                                                | Yes; No                                                                                                                                            |
| 12    | TFQ   | Does the person in the image have a cleft chin (a vertical indentation in the center)?                                    | Yes; No; Information not visible                                                                                                                   |
| 13    | SCQ   | How many layers does the person's chin have in the image?                                                                 | Single chin; Double chin; Information not visible                                                                                                  |
| 14    | SCQ   | What is the width of the person's chin in the image?                                                                      | Broad chin; Narrow chin; Medium wide chin; Information not visible                                                                                 |
| 15    | SCQ   | What is the length of the person's chin in the image?                                                                     | Long chin; Short chin; Medium length chin; Information not visible                                                                                 |
| 16    | SCQ   | What is the shape of the person's chin in the image?                                                                      | Round chin; Square chin; Pointy chin; Information not visible                                                                                      |
| 17    | SCQ   | What is the height of the person's chin in the image?                                                                     | Protruding chin; Receding chin; Vertical chin; Information not visible                                                                             |
| 18    | SCQ   | What is the condition of the person's chin in the image?                                                                  | Tighten; Expand; Natural                                                                                                                           |
| 19    | TFQ   | Are the person's ears visible in the image?                                                                               | Yes; No;                                                                                                                                           |
| 20    | SCQ   | Judging by the left and right orientation of the person in the image, is the person's left ear visible in the image?      | Fully visible; Partially visible; Not visible                                                                                                      |
| 21    | SCQ   | Judging by the left and right orientation of the person in the image, is the person's right ear visible in the image?     | Fully visible; Partially visible; Not visible                                                                                                      |
| 22    | SCQ   | What is the shape of the person's ear tip in the image?                                                                   | Square ear; Pointed ear; Narrow ear; Round ear; Information not visible                                                                            |
| 23    | SCQ   | What is the size of the earlobes of the people in the image?                                                              | Big earlobes; Small earlobes; Medium earlobes; Oversized earlobes; Information not visible                                                         |
| 24    | SCQ   | What type of earlobe does the person in the image have?                                                                   | Free earlobes; Attached earlobes; Partially attached earlobes; Information not visible                                                             |
| 25    | TFQ   | Are the person's ears prominent or protruding in the image?                                                               | Yes; No; Information not visible                                                                                                                   |
| 26    | SCQ   | How large are the person's ears in the image?                                                                             | Small; Large; Medium; Oversized; Information not visible                                                                                           |
| 27    | TFQ   | Are the person's eyebrows visible in the image?                                                                           | Yes; No                                                                                                                                            |
| 28    | SCQ   | Judging by the left and right orientation of the person in the image, is the person's left eyebrow visible in the image?  | Fully visible; Partially visible; Not visible                                                                                                      |
| 29    | SCQ   | Judging by the left and right orientation of the person in the image, is the person's right eyebrow visible in the image? | Fully visible; Partially visible; Not visible                                                                                                      |
| 30    | SCQ   | What is the color of the person's eyebrows in the image?                                                                  | Black; Brown; Blonde; Red or auburn; Gray; White; Other                                                                                            |
| 31    | SCQ   | How wide are the eyebrows of the person in the image?                                                                     | Wide; Narrow; Medium; Information not visible                                                                                                      |
| 32    | SCQ   | How long are the eyebrows of the person in the image?                                                                     | Long; Short; Medium; Information not visible                                                                                                       |
| 33    | SCQ   | What is the distance between the person's eyebrows in the image?                                                          | Wide; Narrow; Medium; Information not visible                                                                                                      |
| 34    | SCQ   | What is the density of the person's eyebrows in the image?                                                                | Thin; Bushy; Medium density                                                                                                                        |
| 35    | SCQ   | What is the shape of the person's eyebrows in the image?                                                                  | S-shaped eyebrows; Hard angled eyebrows; Soft angled eyebrows; Straight eyebrows; Rounded eyebrows; Messy eyebrows; Other; Information not visible |
| 36    | SCQ   | What is the condition of the person's eyebrows in the image?                                                              | Cocked; Scrunched together; Natural state                                                                                                          |
| 37    | TFQ   | Are the person's eyes visible in the image?                                                                               | Yes; No                                                                                                                                            |
| 38    | SCQ   | Judging by the left and right orientation of the person in the image, is the person's left eye visible in the image?      | Fully visible; Partially visible; Not visible                                                                                                      |
| 39    | SCQ   | Judging by the left and right orientation of the person in the image, is the person's right eye visible in the image?     | Fully visible; Partially visible; Not visible                                                                                                      |
| 40    | SCQ   | What type of eyelids does the person in the image have?                                                                   | Single eyelid/monolid; Double eyelid; Triple eyelid; Other; Information not visible                                                                |
| 41    | SCQ   | What is the length of the person's eyelashes in the image?                                                                | Long; Short; Medium; Information not visible                                                                                                       |
| 42    | SCQ   | What is the distance between the eyes of the person in the image?                                                         | Wide; Narrow; Medium; Extra wide; Information not visible                                                                                          |

| Index | Types | Questions                                                                                                                         | Attribute values                                                                                                                                   |
|-------|-------|-----------------------------------------------------------------------------------------------------------------------------------|----------------------------------------------------------------------------------------------------------------------------------------------------|
| 43    | SCQ   | What is the size of the people's eyes in the image?                                                                               | Big; Small; Medium; Oversized; Information not visible                                                                                             |
| 44    | SCQ   | What is the color of the person's pupils in the image?                                                                            | Amber; Blue; Brown; Green; Grey; Hazel; Red-violet; Heterochromatic; Other; Information not visible                                                |
| 45    | SCQ   | What is the shape of the person's eyes in the image?                                                                              | Round eyes; Almond eyes; Upturned eyes; Downturned eyes; Hooded eyes; Protruding eyes; Information not visible                                     |
| 46    | SCQ   | Judging by the left and right orientation of the person in the image, what is the direction of the gaze of the eyes in the image? | Upper; Under; Left; Right; Front; Information not visible                                                                                          |
| 47    | SCQ   | What type of eye bags does the person in the image have?                                                                          | None; Puffiness; Dark circles; Puffiness and dark circles; Information not visible                                                                 |
| 48    | SCQ   | How open are the eyes of the people in the image?                                                                                 | Fully opened eyes; Fully closed eyes; Squinting eyes                                                                                               |
| 49    | TFQ   | Is the person's facial skin visible in the image?                                                                                 | Yes; No                                                                                                                                            |
| 50    | SCQ   | What is the skin tone of the face in the image?                                                                                   | Pale white skin; White skin; Light brown skin; Moderate brown skin; Dark brown skin; Deeply pigmented dark brown to black skin                     |
| 51    | SCQ   | What is the shape of the person's face in the image?                                                                              | Oval face; Round face; Square face; Oblong face; Heart-shaped face; Diamond-shaped face                                                            |
| 52    | SCQ   | What is the obesity level of the face in the image?                                                                               | Fat; Thin; Medium                                                                                                                                  |
| 53    | SCQ   | What is the skin firmness of the face in the image?                                                                               | Firm; Loose; Sagging                                                                                                                               |
| 54    | SCQ   | What type of skin texture is visible in the person shown in the image?                                                            | Dry skin; Oily skin; Normal skin; Sensitive skin                                                                                                   |
| 55    | TFQ   | Does the face in the image show any wrinkles?                                                                                     | Yes; No                                                                                                                                            |
| 56    | MCQ   | What type of wrinkles are present on the person's face in the image?                                                              | Forehead lines; Frown lines; Bunny lines; Crow's feet; Brow droop; Vertical lip lines; Mouth frown; Tear throughs; Nasolabial folds; Mental crease |
| 57    | TFQ   | Does the face in the image have any obvious blemishes?                                                                            | Yes; No                                                                                                                                            |
| 58    | TFQ   | What type of blemishes are present on the face in the image?                                                                      | Scar; Acne; Birthmarks; Pigmentary blemishes/Age spots or sun spots; Other                                                                         |
| 59    | TFQ   | Is the person's forehead visible in the image?                                                                                    | Yes; No                                                                                                                                            |
| 60    | SCQ   | What is the width of the person's forehead in the image?                                                                          | Wide; Narrow; Medium wide; Extra wide; Information not visible                                                                                     |
| 61    | SCQ   | What is the height of the person's forehead in the image?                                                                         | Low; High; Very high; Medium high; Information not visible                                                                                         |
| 62    | TFQ   | Does the person in the image have a forehead that protrudes forward?                                                              | Yes; No; Information not visible                                                                                                                   |
| 63    | TFQ   | Is the person's hair visible in the image?                                                                                        | Yes; No                                                                                                                                            |
| 64    | TFQ   | Does the person in the image have hair loss?                                                                                      | Yes; No; Information not visible                                                                                                                   |
| 65    | SCQ   | What type of hair loss is evident in the person shown in the image?                                                               | Bald top only; Bald sides only; Bald top and sides                                                                                                 |
| 66    | SCQ   | How curly is the person's hair in the image?                                                                                      | Straight; Slightly curly/Wavy hair; Medium curly/Curly hair; Tightly curly/Coily hair                                                              |
| 67    | OEQ   | What is the hair color of the person shown in the image?                                                                          | /                                                                                                                                                  |
| 68    | TFQ   | Does the person in the image have bangs?                                                                                          | Yes; No; Information not visible                                                                                                                   |
| 69    | SCQ   | What type of bangs does the person in the image have?                                                                             | Blunt bangs; Side bangs; Curtain bangs; Other                                                                                                      |
| 70    | SCQ   | What is the length of the person's bangs in the image?                                                                            | Short (above eyebrows); Medium (near eyebrows); Long (below eyebrows)                                                                              |
| 71    | SCQ   | How dense are the bangs on the person in the image?                                                                               | Wispy bangs; Dense bangs; Medium dense bangs                                                                                                       |
| 72    | SCQ   | What is the height of the person's hairline in the image?                                                                         | Low hairline; Medium high hairline; High hairline; Information not visible                                                                         |
| 73    | SCQ   | What type of hairline does the person in the image have?                                                                          | Widow's peak; Triangular hairline; Uneven hairline; Bell-shaped hairline; Straight hairline; Receding hairline or M-shape; Information not visible |
| 74    | SCQ   | What is the length of the person's hair in the image?                                                                             | Buzz cut; Ear length (Pixie); Chin length (Bob); Shoulder length; More than shoulder length; Information not visible                               |
| 75    | SCQ   | What is the hair quality of the person in the image?                                                                              | Dry hair; Oily hair; Normal hair                                                                                                                   |
| 76    | SCQ   | What hairstyle does the person in the image have?                                                                                 | Down style; Updo style; Braid style; Ponytail style; Information not visible                                                                       |
| 77    | SCQ   | Is the person's hair obscured or bald in the image?                                                                               | Bald; Occlusion                                                                                                                                    |
| 78    | SCQ   | Based on the person's orientation in the image, which direction is the person's head oriented in the image?                       | Up; Down; Left; Right; Forward                                                                                                                     |
| 79    | TFQ   | Is the person's mouth open in the image?                                                                                          | Yes; No; Information not visible                                                                                                                   |
| 80    | SCQ   | How wide is the person's mouth open in the image?                                                                                 | Lips slightly parted; Mouth open about 1/4; Mouth open about 1/2; Mouth open about 3/4; Mouth completely open                                      |
| 81    | TFQ   | Are the teeth of the people in the image visible?                                                                                 | Yes; No                                                                                                                                            |

| Index | Types | Questions                                                                                                                                    | Attribute values                                                                                           |
|-------|-------|----------------------------------------------------------------------------------------------------------------------------------------------|------------------------------------------------------------------------------------------------------------|
| 82    | SCQ   | What is the color of the person's teeth in the image?                                                                                        | White; Yellow; Brown; Gray; Other                                                                          |
| 83    | TFQ   | Does the person in the image have a noticeable gap between the teeth?                                                                        | Yes; No                                                                                                    |
| 84    | TFQ   | Are the teeth in the image aligned?                                                                                                          | Yes; No                                                                                                    |
| 85    | TFQ   | Does the person in the image have braces on the teeth?                                                                                       | Yes; No                                                                                                    |
| 86    | TFQ   | Is the person's tongue visible in the image?                                                                                                 | Yes; No                                                                                                    |
| 87    | SCQ   | What is the color of the person's tongue in the image?                                                                                       | Yellow; Ruddy; Pale; Other                                                                                 |
| 88    | TFQ   | Is the person's jawline visible in the image?                                                                                                | Yes; No                                                                                                    |
| 89    | SCQ   | What is the shape of the person's jawline in the image?                                                                                      | Weak jawline; Strong jawline                                                                               |
| 90    | SCQ   | What is the length of the person's jawline in the image?                                                                                     | Long; Short; Medium                                                                                        |
| 91    | TFQ   | Are the person's lips visible in the image?                                                                                                  | Yes; No                                                                                                    |
| 92    | SCQ   | Is the lower lip of the person in the image visible?                                                                                         | Fully visible; Partially visible; Not visible                                                              |
| 93    | SCQ   | Is the upper lip of the person in the image visible?                                                                                         | Fully visible; Partially visible; Not visible                                                              |
| 94    | SCQ   | What is the width of the person's lips in the image?                                                                                         | Wide lips; Narrow lips; Medium width lips; Information not visible                                         |
| 95    | SCQ   | What is the thickness of the person's lips in the image?                                                                                     | Full lips; Thin lips; Heavy upper lip; Heavy lower lip; Information not visible                            |
| 96    | SCQ   | What is the shape of the person's lips in the image?                                                                                         | Round lips; Downward-turned lips; Bow-shaped lips; Heart-shaped lips; Uneven lips; Information not visible |
| 97    | OEQ   | What is the color of the person's lips in the image?                                                                                         | /                                                                                                          |
| 98    | TFQ   | Does the person in the image have a mustache?                                                                                                | Yes; No; Information not visible                                                                           |
| 99    | OEQ   | What is the color of the person's mustache in the image?                                                                                     | /                                                                                                          |
| 100   | SCQ   | How dense is the person's mustache in the image?                                                                                             | Dense; Sparse; Medium dense                                                                                |
| 101   | SCQ   | What is the length of the person's mustache in the image?                                                                                    | Long; Short; Medium length                                                                                 |
| 102   | TFQ   | Are the mustache and beard connected in the image?                                                                                           | Yes, mustache connected to beard; No, mustache isolated; Information not visible                           |
| 103   | TFQ   | Is the person's neck visible in the image?                                                                                                   | Yes; No                                                                                                    |
| 104   | SCQ   | How long is the person's neck in the image?                                                                                                  | Long; Short; Medium length; Information not visible                                                        |
| 105   | SCQ   | How thick is the person's neck in the image?                                                                                                 | Thin; Thick; Medium thickness; Information not visible                                                     |
| 106   | TFQ   | Does the person in the image have an Adam's apple?                                                                                           | Yes; No; Information not visible                                                                           |
| 107   | SCQ   | What type of neck wrinkles does the person in the image have?                                                                                | No neck wrinkles; Mild neck wrinkles; Deep neck wrinkles                                                   |
| 108   | TFQ   | Is the person's nose visible in the image?                                                                                                   | Yes; No                                                                                                    |
| 109   | SCQ   | What is the height of the nasal bridge of the person in the image?                                                                           | Low nasal bridge; High nasal bridge; Medium height nasal bridge; Information not visible                   |
| 110   | SCQ   | What is the shape of the nasal bridge on the person in the image?                                                                            | Straight nasal bridge; Convex nasal bridge; Concave nasal bridge; Information not visible                  |
| 111   | SCQ   | What is the width of the person's nose in the image?                                                                                         | Wide nose; Narrow nose; Medium width nose; Information not visible                                         |
| 112   | SCQ   | What is the shape of the tip of the person's nose in the image?                                                                              | Pointed nose tip; Round nose tip; Flat nose tip; Information not visible                                   |
| 113   | SCQ   | In which direction is the tip of the nose tilted in the image?                                                                               | Upturned tip; Horizontal tip; Downturned tip; Information not visible                                      |
| 114   | SCQ   | What is the size of the nasal alae in the person shown in the image?                                                                         | Small; Large; Medium; Information not visible                                                              |
| 115   | SCQ   | In which direction is the nasal alae tilted in the image?                                                                                    | Upturned nasal alae; Horizontal nasal alae; Downward nasal alae; Information not visible                   |
| 116   | SCQ   | Are the nostrils of the people visible in the image?                                                                                         | Fully visible; Partially visible; Not visible                                                              |
| 117   | SCQ   | What is the size of the person's nostrils in the image?                                                                                      | Small; Large; Medium                                                                                       |
| 118   | SCQ   | What is the shape of the person's nostrils in the image?                                                                                     | Oval nostrils; Round nostrils; Teardrop nostrils; Other                                                    |
| 119   | TFQ   | Does the person in the image have sideburns?                                                                                                 | Yes; No; Information not visible                                                                           |
| 120   | OEQ   | What is the color of the person's sideburns in the image?                                                                                    | /                                                                                                          |
| 121   | TFQ   | Are the sideburns and beard connected in the image?                                                                                          | Yes, sideburns connected to beard; No, sideburns isolated; Information not visible                         |
| 122   | TFQ   | Is the person in the image wearing any earrings?                                                                                             | Yes; No; Information not visible                                                                           |
| 123   | OEQ   | What color is the earring that the person in the image is wearing?                                                                           | /                                                                                                          |
| 124   | SCQ   | Judging by the left and right orientation of the person in the image, how many earrings is the person in the image wearing on the left ear?  | Zero; One; Multiple; Information not visible                                                               |
| 125   | SCQ   | Judging by the left and right orientation of the person in the image, how many earrings is the person in the image wearing on the right ear? | Zero; One; Multiple; Information not visible                                                               |
| 126   | SCQ   | What is the size of the earrings the person is wearing in the image?                                                                         | Small; Large; Medium; Information not visible                                                              |
| 127   | SCQ   | What kind of earrings is the person wearing in the image?                                                                                    | Stud earrings; Hoop earrings; Drop earrings; Other                                                         |
| 128   | SCQ   | What material is the earring worn by the person in the image made of?                                                                        | Gold; Silver; Fabric; Plastic; Pearls; Gemstones; Other                                                    |
| 129   | TFQ   | Is the person in the image wearing an eye mask?                                                                                              | Yes; No                                                                                                    |

| Index | Types | Questions                                                                               | Attribute values                                                                                                          |
|-------|-------|-----------------------------------------------------------------------------------------|---------------------------------------------------------------------------------------------------------------------------|
| 130   | OEQ   | What color is the eye mask that the person in the image is wearing?                     | /                                                                                                                         |
| 131   | SCQ   | What pattern is on the eye mask that the person in the image is wearing?                | Plaid; Solid; Floral; Striped; Graphic; Other                                                                             |
| 132   | SCQ   | What is the material of the eye mask worn by the person in the image?                   | Cotton; Fabric; Lace; Fur; Other                                                                                          |
| 133   | TFQ   | Is the person in the image wearing a face mask?                                         | Yes; No                                                                                                                   |
| 134   | OEQ   | What color is the face mask that the person in the image is wearing?                    | /                                                                                                                         |
| 135   | SCQ   | What type of face mask is the person in the image wearing?                              | Skin care mask; Gas mask; Decorative mask; Sun protection mask; Other                                                     |
| 136   | SCQ   | What material is the face mask worn by the person in the image made of?                 | Fabric; Plastic; Other                                                                                                    |
| 137   | TFQ   | Is the person in the image wearing glasses?                                             | Yes; No                                                                                                                   |
| 138   | OEQ   | What color are the glasses that the person in the image is wearing?                     | /                                                                                                                         |
| 139   | SCQ   | What type of glasses are the people in the image wearing?                               | VR glasses; Eyeglasses; Sunglasses; Swimming goggles; Protection goggles; Other                                           |
| 140   | SCQ   | What size are the glasses worn by the people in the image?                              | Small; Medium; Large; Oversized                                                                                           |
| 141   | SCQ   | How transparent are the lenses of the glasses shown in the image?                       | Opaque; Transparent; Transparent with color                                                                               |
| 142   | SCQ   | What shape are the glasses worn by the person in the image?                             | Oval glasses; Round glasses; Square glasses; Aviator glasses; Cat eye glasses; Browline glasses; Geometric glasses; Other |
| 143   | SCQ   | What type of rim do the glasses shown in the image have?                                | Full-rimmed; Semi-rimless; Rimless; Other; Information not visible                                                        |
| 144   | SCQ   | What material are the frames of the glasses shown in the image made of?                 | Plastic eyeglass frames; Metal eyeglass frames; Other                                                                     |
| 145   | TFQ   | Is the person in the image wearing any hair accessories?                                | Yes; No                                                                                                                   |
| 146   | OEQ   | What color is the hair accessory that the person in the image is wearing?               | /                                                                                                                         |
| 147   | SCQ   | What type of hair accessories is the person in the image wearing?                       | Hairpins; Headbands; Head scarf; Wreath; Crown; Veil; Other                                                               |
| 148   | SCQ   | What material are the hair accessories that the person in the image is wearing made of? | Fabric; Jewelry; Metal; Plastic; Wooden; Other                                                                            |
| 149   | TFQ   | Is the person in the image wearing a hat?                                               | Yes; No                                                                                                                   |
| 150   | OEQ   | What color is the hat worn by the person in the image?                                  | /                                                                                                                         |
| 151   | SCQ   | What is the size of the hat worn by the person in the image?                            | Small; Large; Medium                                                                                                      |
| 152   | SCQ   | What type of the hat is worn by the person in the image?                                | Casual hat; Sports hat; Safety helmet; Graduate hat; Professional hat; National hat; Other                                |
| 153   | SCQ   | What type of brim does the hat worn by the person in the image have?                    | Brimless hat; Front brim hat; Full brim hat; Other                                                                        |
| 154   | SCQ   | What type of crown does the hat worn by the person in the image have?                   | High hat top; Pointed hat top; Flat hat top; No hat top; Other; Information not visible                                   |
| 155   | TFQ   | Is the person in the image wearing headphones?                                          | Yes; No; Information not visible                                                                                          |
| 156   | OEQ   | What color are the headphones that the person in the image is wearing?                  | /                                                                                                                         |
| 157   | SCQ   | What type of headphones is the person in the image wearing?                             | In-ear; Over-ear; Other                                                                                                   |
| 158   | SCQ   | Are the headphones in the image wired or wireless?                                      | Wired headphones; Wireless headphones; Information not visible                                                            |
| 159   | TFQ   | Is the person in the image wearing a mask?                                              | Yes; No                                                                                                                   |
| 160   | OEQ   | What color is the mask that the person in the image is wearing?                         | /                                                                                                                         |
| 161   | SCQ   | What kind of mask is the person in the image wearing?                                   | Medical/Surgical mask; Daily use mask; Oxygen mask; Other                                                                 |
| 162   | SCQ   | What material is the mask worn by the person in the image made of?                      | Fabric; Plastic; Other                                                                                                    |
| 163   | TFQ   | Is the person in the image wearing a necklace?                                          | Yes; No; Information not visible                                                                                          |
| 164   | OEQ   | What color is the necklace worn by the person in the image?                             | /                                                                                                                         |
| 165   | SCQ   | How many necklaces is the person in the image wearing?                                  | One necklace; Multiple necklaces (e.g., 2 or more)                                                                        |
| 166   | SCQ   | Is the person in the image wearing a necklace with a pendant?                           | Yes; No; Information not visible                                                                                          |
| 167   | SCQ   | What is the size of the necklace worn by the person in the image?                       | Large; Small; Medium; Information not visible                                                                             |
| 168   | SCQ   | What material is the necklace worn by the person in the image made of?                  | Gold; Silver; Fabric; Plastic; Pearls; Gemstones; Other                                                                   |
| 169   | TFQ   | Is the individual in the image wearing a scarf?                                         | Yes; No; Information not visible                                                                                          |
| 170   | OEQ   | What is the color of the scarf worn by the person in the image?                         | /                                                                                                                         |
| 171   | SCQ   | What pattern does the scarf worn by the person in the image have?                       | Plaid; Solid; Floral; Striped; Graphic; Other                                                                             |
| 172   | SCQ   | What material is the scarf worn by the person in the image made of?                     | Cotton; Fabric; Lace; Fur; Other                                                                                          |
| 173   | TFQ   | Is the person in the image wearing any special accessories?                             | Yes; No                                                                                                                   |
| 174   | OEQ   | What special accessories are the people in the image wearing?                           | /                                                                                                                         |
| 175   | TFQ   | Is the person in the image wearing a tie?                                               | Yes; No; Information not visible                                                                                          |
| 176   | OEQ   | What is the color of the tie worn by the person in the image?                           | /                                                                                                                         |
| 177   | SCQ   | What type of tie is the person in the image wearing?                                    | Bowtie; Necktie; Other; Information not visible                                                                           |
| 178   | SCQ   | What pattern does the tie worn by the person in the image have?                         | Plaid; Solid; Floral; Striped; Graphic; Other                                                                             |
| 179   | TFQ   | Is the person in the image wearing any tops?                                            | Yes; No; Information not visible                                                                                          |
| 180   | OEQ   | What color is the top the person in the image is wearing?                               | /                                                                                                                         |

| Index | Types | Questions                                                                                                                                                                                                     | Attribute values                                                                                                                                                                                                                                                                                                                                                                                                                                                                                                                                                                                      |
|-------|-------|---------------------------------------------------------------------------------------------------------------------------------------------------------------------------------------------------------------|-------------------------------------------------------------------------------------------------------------------------------------------------------------------------------------------------------------------------------------------------------------------------------------------------------------------------------------------------------------------------------------------------------------------------------------------------------------------------------------------------------------------------------------------------------------------------------------------------------|
| 181   | SCQ   | What is the collar size of the top the person in the image is wearing?                                                                                                                                        | Oversized; Large; Medium; Small; Information not visible                                                                                                                                                                                                                                                                                                                                                                                                                                                                                                                                              |
| 182   | SCQ   | What type of collar is on the top the person is wearing in the image?                                                                                                                                         | Scoop neckline; Collar; V-neckline; High neckline; Square neckline; Off-shoulder top; Suspender top; Other; Information not visible                                                                                                                                                                                                                                                                                                                                                                                                                                                                   |
| 183   | SCQ   | How blurry is the face in the image?                                                                                                                                                                          | Low blurriness; High blurriness; Medium blurriness                                                                                                                                                                                                                                                                                                                                                                                                                                                                                                                                                    |
| 184   | SCQ   | Based on the person's orientation in the image, what direction is the light coming from?                                                                                                                      | Back lighting (Lighting coming from behind the face); Front lighting (Lighting coming from in front of the face); Upward lighting (Lighting coming from below the face); Downward lighting (Lighting coming from above the face); Left-side lighting (Lighting coming from the left side of the face); Right-side lighting (Lighting coming from the right side of the face); Information not visible                                                                                                                                                                                                 |
| 185   | SCQ   | What is the lighting intensity of the face in the image?                                                                                                                                                      | Normal brightness; Excessive brightness; Insufficient brightness; Uneven lighting                                                                                                                                                                                                                                                                                                                                                                                                                                                                                                                     |
| 186   | SCQ   | What type of lighting is present in the image?                                                                                                                                                                | Natural lighting; Artificial lighting; Information not visible                                                                                                                                                                                                                                                                                                                                                                                                                                                                                                                                        |
| 187   | TFQ   | Is the human face in the image obscured or partially obstructed by any objects?                                                                                                                               | Yes; No                                                                                                                                                                                                                                                                                                                                                                                                                                                                                                                                                                                               |
| 188   | OEQ   | What object is obscuring or partially obscuring the face in the image?                                                                                                                                        | /                                                                                                                                                                                                                                                                                                                                                                                                                                                                                                                                                                                                     |
| 189   | OEQ   | What does the surrounding environment look like in the image? Please describe the environment surrounding the person in the image in one sentence, and infer the person's behavior based on that environment. | /                                                                                                                                                                                                                                                                                                                                                                                                                                                                                                                                                                                                     |
| 190   | SCQ   | What is the most likely age range of the individuals in the image?                                                                                                                                            | 0-2; 3-9; 10-19; 20-29; 30-39; 40-49; 50-59; 60-69; more than 70                                                                                                                                                                                                                                                                                                                                                                                                                                                                                                                                      |
| 191   | SCQ   | To which racial or ethnic group do the individuals in the image most likely belong?                                                                                                                           | Black; White; Latino Hispanic; Indian; East Asian; Middle Eastern; Southeast Asian                                                                                                                                                                                                                                                                                                                                                                                                                                                                                                                    |
| 192   | SCQ   | What is the individual's gender in the image?                                                                                                                                                                 | Male; Female                                                                                                                                                                                                                                                                                                                                                                                                                                                                                                                                                                                          |
| 193   | SCQ   | Which emotion is most likely conveyed by the facial expression in the image?                                                                                                                                  | Surprise; Fear; Disgust; Happiness; Sadness; Anger; Neutral                                                                                                                                                                                                                                                                                                                                                                                                                                                                                                                                           |
| 194   | SCQ   | Which facial action units are present in the image?                                                                                                                                                           | AU1 (Inner Brow Raiser); AU2 (Outer Brow Raiser); AU4 (Brow Lowerer); AU5 (Upper Lid Raiser); AU6 (Cheek Raiser); AU7 (Lid Tightener); AU9 (Nose Wrinkler); AU10 (Upper Lip Raiser); AU12 (Lip Corner Puller); AU14 (Dimpler); AU15 (Lip Corner Depressor); AU16 (Lower Lip Depressor); AU17 (Chin Raiser); AU18 (Lip Pucker); AU19 (Tongue Visible); AU20 (Lip stretcher); AU22 (Lip Funneler); AU23 (Lip Tightener); AU24 (Lip Pressor); AU25 (Lips part); AU26 (Jaw Drop); AU27 (Mouth Stretch); AU28 (Lip Suck); AU29 (Jaw Thrust); AU35 (Cheek Suck); AU43 (Eyes Closed); No Facial Action Units |

Table S5. Detailed definitions of questions and attribute values in the hierarchical facial attribute structure. "/" represents an open-ended answer.



### Prompt example for true/false and single-choice question

<face image>

Question: What is the skin tone of the face in the image?

Options:

Pale white skin

White skin

Light brown skin

...

Please directly select the appropriate option from the given choices based on the image.

Please return the answer directly without additional explanation.

### Prompt example for multiple-choice question

<face image>

Question: What type of wrinkles are present on the person's face in the image?

Options:

Forehead lines

Frown lines

Bunny lines

...

Please select one or more appropriate options from the given choices based on the image.

Please return the answer directly without additional explanation.

### Prompt example for open-ended question

<face image>

Question: What is the hair color of the person shown in the image?

Answer the question using a single word or phrase.

Please return the answer directly without additional explanation.

Table S6. Prompt examples for true/false, single-choice, multiple-choice, and open-ended questions.

|                                                                                                                                                                                                                                                                                                                                           |                                                                                                                                                                                                                                                                                                |                                                                                                                                                                                                                                                                                                                                                                                                                                                                                |
|-------------------------------------------------------------------------------------------------------------------------------------------------------------------------------------------------------------------------------------------------------------------------------------------------------------------------------------------|------------------------------------------------------------------------------------------------------------------------------------------------------------------------------------------------------------------------------------------------------------------------------------------------|--------------------------------------------------------------------------------------------------------------------------------------------------------------------------------------------------------------------------------------------------------------------------------------------------------------------------------------------------------------------------------------------------------------------------------------------------------------------------------|
|  <p>What type of earlobe does the person in the image have?</p> <p>Free earlobes<br/><b>Attached earlobes</b><br/>Partially attached earlobes<br/>Information not visible</p>                                                                          |  <p>What is the color of the person's pupils in the image?</p> <p>Amber<br/><b>Blue</b><br/>Brown<br/>Green<br/>Grey<br/>Hazel<br/>Red-violet<br/>Heterochromatic<br/>Other<br/>Information not visible</p> |  <p>What is the individual's gender in the image?</p> <p>Male<br/><b>Female</b></p>                                                                                                                                                                                                                                                                                                       |
|  <p>What color are the headphones that the person in the image is wearing?</p> <p><b>Black</b></p>                                                                                                                                                     |  <p>What is the shape of the person's ear tip in the image?</p> <p>Square ear<br/><b>Pointed ear</b><br/>Narrow ear<br/>Round ear<br/>Information not visible</p>                                           |  <p>To which racial or ethnic group do the individuals in the image most likely belong?</p> <p>Black<br/>White<br/>Latino_Hispanic<br/><b>Indian</b><br/>East Asian<br/>Middle Eastern<br/>Southeast Asian</p>                                                                                                                                                                            |
|  <p>What is the shape of the person's eyebrows in the image?</p> <p>S-shaped eyebrows<br/><b>Hard angled eyebrows</b><br/>Soft angled eyebrows<br/>Straight eyebrows<br/>Rounded eyebrows<br/>Messy eyebrows<br/>Other<br/>Information not visible</p> |  <p>What is the shape of the person's face in the image?</p> <p><b>Oval face</b><br/>Round face<br/>Square face<br/>Oblong face<br/>Heart-shaped face<br/>Diamond-shaped face</p>                           |  <p>Which facial action units are present in the image?</p> <p><b>AU1 (Inner Brow Raiser)</b><br/><b>AU2 (Outer Brow Raiser)</b><br/>AU4 (Brow Lowerer)<br/>AU5 (Upper Lid Raiser)<br/>AU6 (Cheek Raiser)<br/>AU7 (Lid Tightener)<br/>AU9 (Nose Wrinkler)<br/>AU10 (Upper Lip Raiser)<br/><b>AU12 (Lip Corner Puller)</b><br/>AU14 (Dimpler)<br/>AU15 (Lip Corner Depressor)<br/>....</p> |
|  <p>How transparent are the lenses of the glasses shown in the image?</p> <p>Opaque<br/>Transparent<br/><b>Transparent with color</b></p>                                                                                                              |  <p>What is the most likely age range of the individuals in the image?</p> <p>0-2<br/><b>3-9</b><br/>10-19<br/>20-29<br/>30-39<br/>40-49<br/>50-59<br/>60-69<br/>more than 70</p>                           |  <p>Which emotion is most likely conveyed by the facial expression in the image?</p> <p><b>Surprise</b><br/>Fear<br/>Disgust<br/>Happiness<br/>Sadness<br/>Anger<br/>Neutral</p>                                                                                                                                                                                                          |

Figure S6. VQA examples from FaceBench, encompassing multi-views and multi-level attributes, with correct answers highlighted in red.

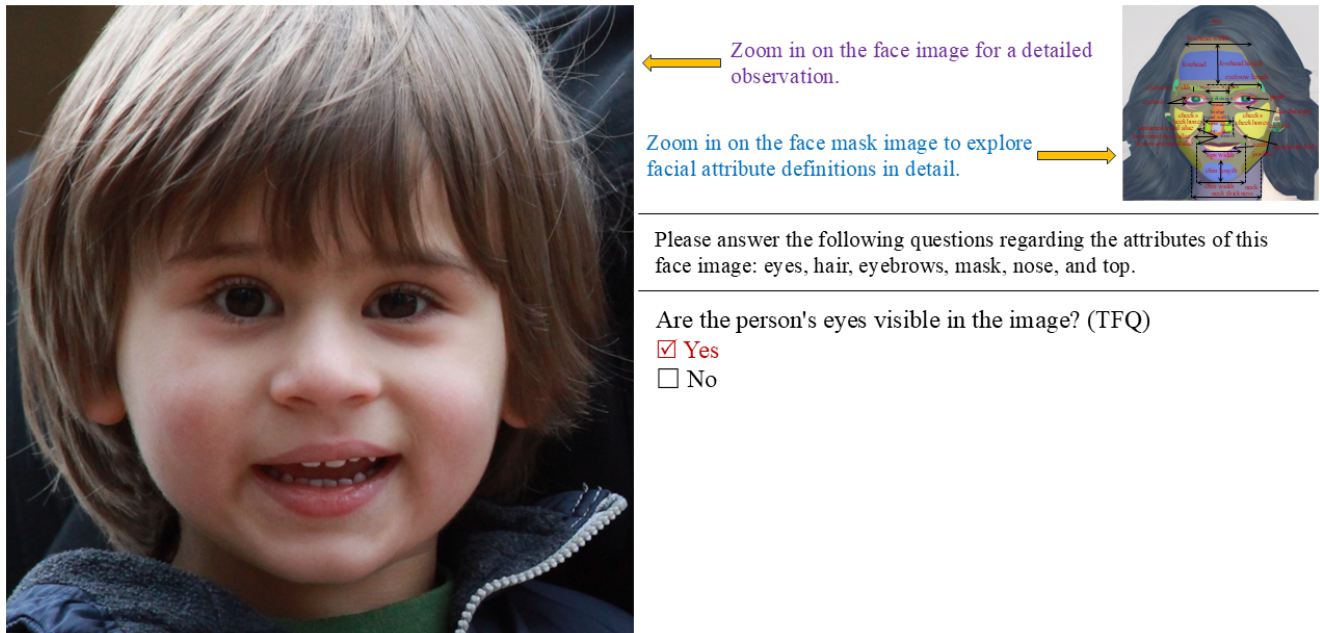

Figure S7. A true/false question example of our annotation system.

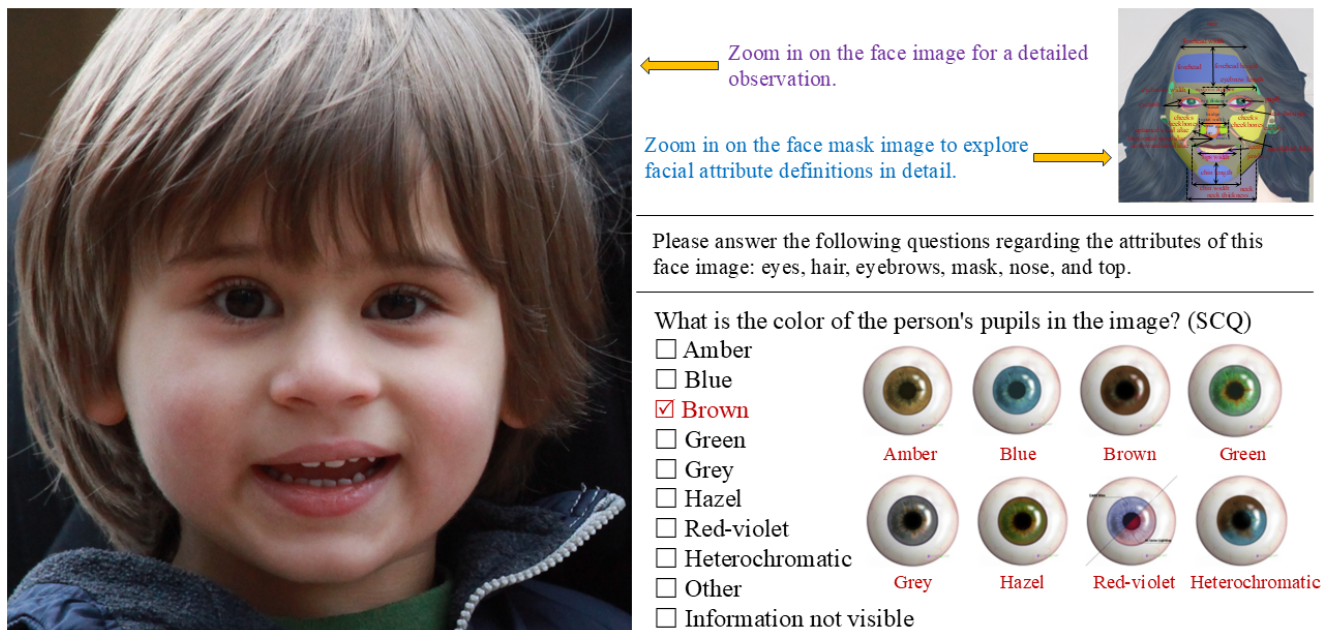

Figure S8. A single-choice question example of our annotation system.



← Zoom in on the face image for a detailed observation.

Zoom in on the face mask image to explore facial attribute definitions in detail. →



---

Please answer the following questions regarding the attributes of this face image: skin, hair, eyebrows, mask, hat, and top.

---

What type of wrinkles are present on the person's face in the image? (MCQ)

- ☒ Forehead lines
- ☐ Frown lines
- ☐ Bunny lines
- ☒ Crow's feet
- ☐ Brow droop
- ☐ Vertical lip lines
- ☒ Mouth frown
- ☒ Tear throughs
- ☒ Nasolabial folds
- ☐ Mental crease



Figure S9. A multiple-choice question example of our annotation system.



← Zoom in on the face image for a detailed observation.

Zoom in on the face mask image to explore facial attribute definitions in detail. →



---

Please answer the following questions regarding the attributes of this face image: skin, hair, eyebrows, mask, hat, and top.

---

What color is the hat worn by the person in the image? (OEQ)

white

Figure S10. An open-ended question example of our annotation system.



Comparison of 7660.jpg

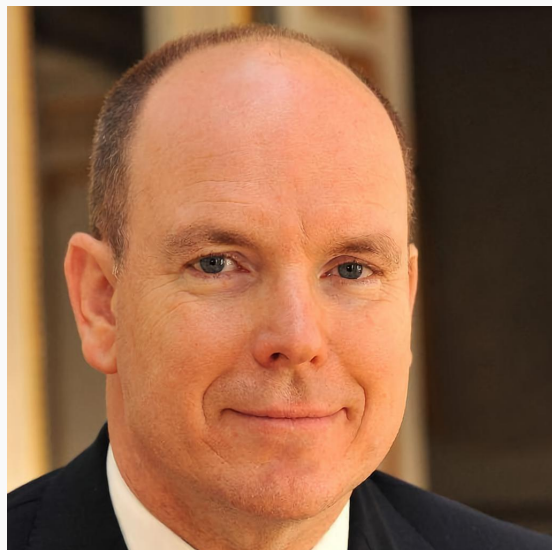

**Question:** What type of wrinkles are present on the person's face in the image?

**Options:** Forehead lines; Frown lines; Bunny lines; Crow's feet; Brow droop; Vertical lip lines; Mouth frown; Tear troughs; Nasolabial folds; Mental crease

**Answer:** Forehead lines; Frown lines; Crow's feet; Nasolabial folds; Mouth frown

—— Below are the model predictions ——

**LLaVA:** Frown lines

**LLaMA:** Forehead lines

**GPT-4o:** Forehead lines; Crow's feet; Nasolabial folds

**Face-LLaVA:** Forehead lines

**Question:** What type of hair loss is evident in the person shown in the image?

**Options:** Bald top only; Bald sides only; Bald top and sides

**Answer:** Bald top only

—— Below are the model predictions ——

**LLaVA:** Bald top and sides

**LLaMA:** Bald top and sides

**GPT-4o:** Bald top only

**Face-LLaVA:** Bald top only

**Question:** In which direction is the tip of the nose tilted in the image?

**Options:** Uprturned tip; Horizontal tip; Downturned tip  
Information not visible

**Answer:** Horizontal tip

—— Below are the model predictions ——

**LLaVA:** Uprturned tip

**LLaMA:** Downturned tip

**GPT-4o:** Horizontal tip

**Face-LLaVA:** Horizontal tip

Figure S11. An example of qualitative comparison.

Comparison of 60022.png

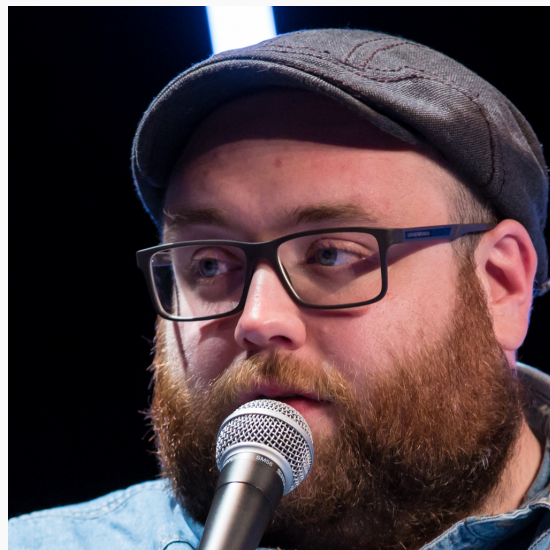

**Question:** How transparent are the lenses of the glasses shown in the image?

**Options:** Opaque; Transparent; Transparent with color

**Answer:** Transparent

—— Below are the model predictions ——

**LLaVA:** Opaque

**LLaMA:** Transparent

**GPT-4o:** Transparent

**Face-LLaVA:** Opaque

**Question:** What type of brim does the hat worn by the person in the image have?

**Options:** Brimless hat; Front brim hat; Full brim hat; Other

**Answer:** Front brim hat

—— Below are the model predictions ——

**LLaVA:** Barely visible brim

**LLaMA:** Other

**GPT-4o:** Front brim hat

**Face-LLaVA:** Full brim hat

**Question:** What is the height of the nasal bridge of the person in the image?

**Options:** Low nasal bridge; High nasal bridge; Medium height nasal bridge; Information not visible

**Answer:** Medium height nasal bridge

—— Below are the model predictions ——

**LLaVA:** Low nasal bridge

**LLaMA:** Medium height nasal bridge

**GPT-4o:** Medium height nasal bridge

**Face-LLaVA:** Medium height nasal bridge

Figure S12. An example of qualitative comparison.

Comparison of 60072.png

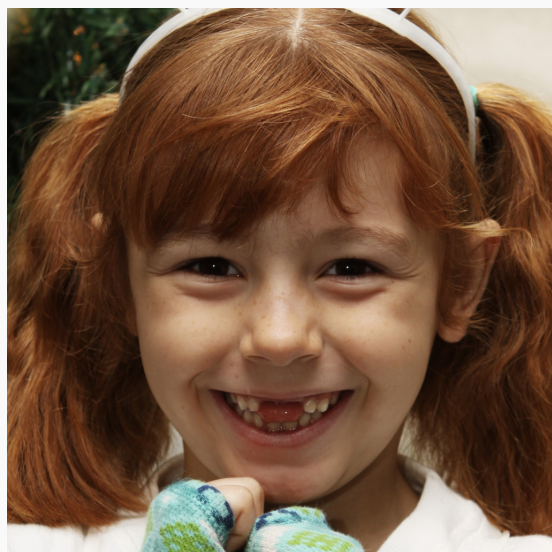

**Question:** What color are the person's cheeks in the image?

**Options:** Other color; Flushed cheeks; Same color as skin

**Answer:** Same color as skin

Below are the model predictions

**LLaVA:** Flushed cheeks

**LLaMA:** Flushed cheeks

**GPT-4o:** Flushed cheeks

**Face-LLaVA:** Same color as skin

**Question:** What is the length of the person's bangs in the image?

**Options:** Short (above eyebrows); Medium (near eyebrows); Long (below eyebrows)

**Answer:** Medium (near eyebrows)

Below are the model predictions

**LLaVA:** Short (above eyebrows)

**LLaMA:** Short (above eyebrows)

**GPT-4o:** Short (above eyebrows)

**Face-LLaVA:** Medium (near eyebrows)

**Question:** What is the collar size of the top the person in the image is wearing?

**Options:** Oversized; Large; Medium; Small; Information not visible

**Answer:** Medium

Below are the model predictions

**LLaVA:** Oversized

**LLaMA:** Small

**GPT-4o:** Information not visible

**Face-LLaVA:** Oversized

Figure S13. An example of qualitative comparison.

Comparison of 62314.png

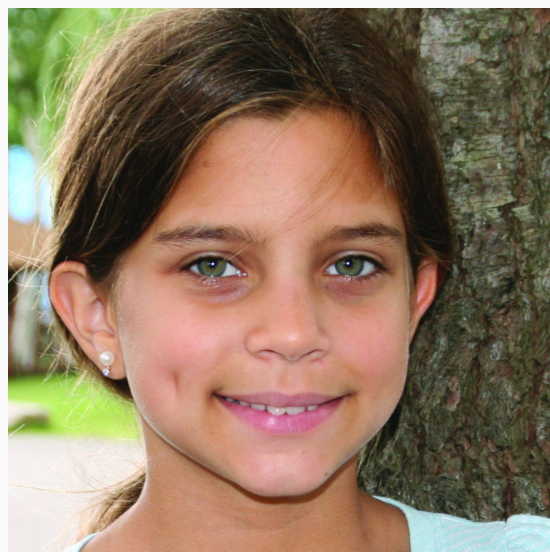

**Question:** What is the shape of the person's cheekbones in the image?

**Options:** Low cheekbones; High cheekbones; Medium height cheekbones

**Answer:** Medium height cheekbones

Below are the model predictions

**LLaVA:** Low cheekbones

**LLaMA:** Medium height cheekbones

**GPT-4o:** Medium height cheekbones

**Face-LLaVA:** Medium height cheekbones

**Question:** What is the density of the person's eyebrows in the image?

**Options:** Thin; Bushy; Medium density

**Answer:** Medium density

Below are the model predictions

**LLaVA:** Bushy

**LLaMA:** Thin

**GPT-4o:** Medium density

**Face-LLaVA:** Medium density

**Question:** What is the length of the person's jawline in the image?

**Options:** Long; Short; Medium

**Answer:** Medium

Below are the model predictions

**LLaVA:** Long

**LLaMA:** Short

**GPT-4o:** Medium

**Face-LLaVA:** Medium

Figure S14. An example of qualitative comparison.



## References

- [1] <https://mmlab.ie.cuhk.edu.hk/projects/celeba.html>. 3
- [2] <https://openai.com/index/chatgpt/>. 3
- [3] Josh Achiam, Steven Adler, Sandhini Agarwal, Lama Ahmad, Ilge Akkaya, Florencia Leoni Aleman, Diogo Almeida, Janko Altschmidt, Sam Altman, Shyamal Anadkat, et al. Gpt-4 technical report. *arXiv preprint arXiv:2303.08774*, 2023. 2, 3
- [4] Edward J Hu, Yelong Shen, Phillip Wallis, Zeyuan Allen-Zhu, Yuanzhi Li, Shean Wang, Lu Wang, and Weizhu Chen. Lora: Low-rank adaptation of large language models. *arXiv preprint arXiv:2106.09685*, 2021. 2
- [5] Haotian Liu, Chunyuan Li, Qingyang Wu, and Yong Jae Lee. Visual instruction tuning. *Advances in neural information processing systems*, 36, 2024. 2, 3
- [6] Ziwei Liu, Ping Luo, Xiaogang Wang, and Xiaoou Tang. Deep learning face attributes in the wild. In *Proceedings of the IEEE international conference on computer vision*, pages 3730–3738, 2015. 3
- [7] Gemini Team, Rohan Anil, Sebastian Borgeaud, Jean-Baptiste Alayrac, Jiahui Yu, Radu Soricut, Johan Schalkwyk, Andrew M Dai, Anja Hauth, Katie Millican, et al. Gemini: a family of highly capable multimodal models. *arXiv preprint arXiv:2312.11805*, 2023. 2
- [8] Hugo Touvron, Thibaut Lavril, Gautier Izacard, Xavier Martinet, Marie-Anne Lachaux, Timothée Lacroix, Baptiste Rozière, Naman Goyal, Eric Hambro, Faisal Azhar, et al. Llama: Open and efficient foundation language models. *arXiv preprint arXiv:2302.13971*, 2023. 3
- [9] Yuxuan Zhang, Huan Ling, Jun Gao, Kangxue Yin, Jean-Francois Lafleche, Adela Barriuso, Antonio Torralba, and Sanja Fidler. Datasetgan: Efficient labeled data factory with minimal human effort. In *Proceedings of the IEEE/CVF Conference on Computer Vision and Pattern Recognition*, pages 10145–10155, 2021. 1
